# Supplementary material for: Discerning the functional networks behind processing of music and speech through human vocalizations
Source: PubMed Central journal article supplement (PMC6786620; doi:10.1371/journal.pone.0222796), 2019-10-10
Supplement: pone.0222796.s003.pdf [file pone.0222796.s003.pdf]

| Subject | Practice (y) | Age of onset (y) | Weekly practice (h) | Weekly listening (h) | Instruments played                                                       | Main expertise                                              |
|---------|--------------|------------------|---------------------|----------------------|--------------------------------------------------------------------------|-------------------------------------------------------------|
| 1       | 13           | 7                | 5                   | 14                   | (5) guitar, keyboard, bass, harmonica and flute                          | (1) guitar                                                  |
| 2       | 30           | 12               | 10                  | 30                   | (3) flute, guitar, piano and violin                                      | (1) violin                                                  |
| 3       | 8            | 12               | 5                   | 10                   | (7) piano, guitar, bass, ukulele, saxophone, synthesizer and percussions | (6) piano, guitar, bass, ukulele, saxophone and synthesizer |
| 4       | 13           | 7                | 9                   | >30                  | (3) piano, psaltery, voice                                               | (3) piano, psaltery, voice                                  |
| 5       | 8            | 18               | 15                  | 50                   | (2) guitar and saxophone                                                 | (1) saxophone                                               |
| 6       | 12           | 12               | 12                  | 14-20                | (4) guitar, bass, mandoline and keyboard                                 | (1) guitar                                                  |
| 7       | 22           | 5                | 5                   | 20                   | (4) piano, guitar, bass, harmonica                                       | (2) guitar and piano                                        |
| 8       | 27           | 13               | 8                   | 40                   | (2) guitar and violin                                                    | (1) guitar                                                  |
| 9       | 21           | 6                | 15                  | 50                   | (4) piano, guitar, bass, percussions                                     | (2) piano and bass                                          |
| 10      | 13           | 8                | 32                  | 50-60                | (4) violin, piano, guitar, voice                                         | (3) violin, piano and voice                                 |
| 11      | 19           | 7                | 20                  | 28                   | (2) piano and voice                                                      | (1) voice                                                   |
| 12      | 51           | 3                | 12                  | 65                   | (3) piano, guitar and percussion                                         | (1) guitar                                                  |
| 13      | 7            | 18               | 18                  | 12                   | (3) violin, piano and flute                                              | (1) violin and piano                                        |
| 14      | 30           | 8                | 28                  | 35-56                | (1) piano                                                                | (1) piano                                                   |
| 15      | 28           | 14               | 6                   | 21-42                | (3) voice, piano and guitar                                              | (1) voice                                                   |
| 16      | 2            | 29               | 3                   | 10                   | (1) piano                                                                | (1) piano                                                   |

**Table S.1.** Musical training information
